# Supplementary material for: The role of virtual reality on outcomes in rehabilitation of Parkinson’s disease: meta-analysis and systematic review in 1031 participants
Source: Neurol Sci. 2019 Dec 6;41(3):529–36. doi: 10.1007/s10072-019-04144-3 (PMC7040061; doi:10.1007/s10072-019-04144-3)
Supplement: Supplementary file 1 — (PDF 500 kb) [file 10072_2019_4144_MOESM1_ESM.pdf]

**Supplementary Fig. 1** Forest plot of six studies comparing the effects of VR training and active intervention on gait speed.

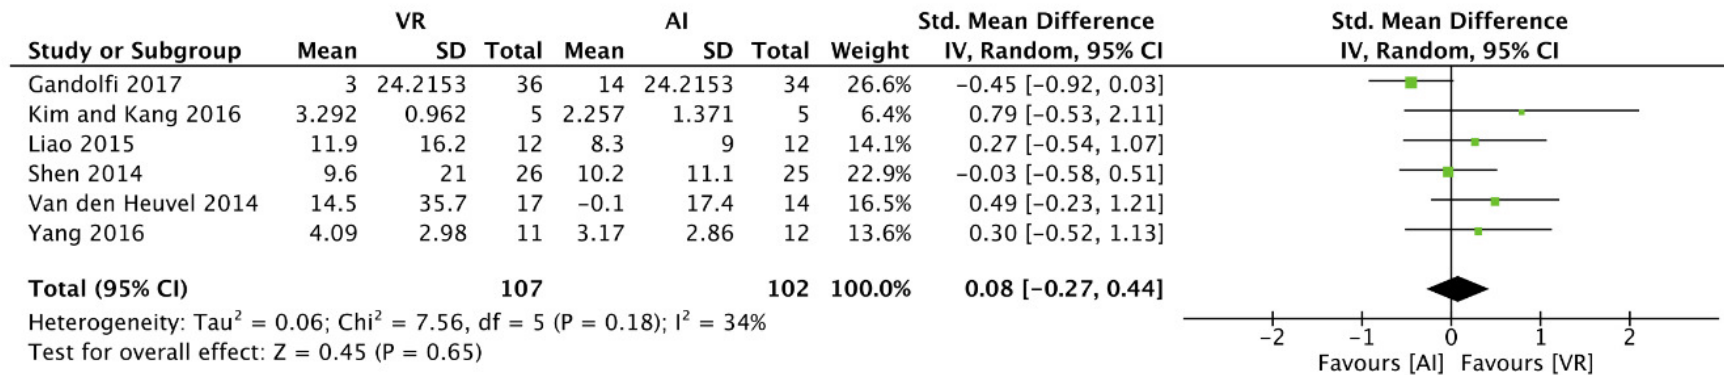

**Supplementary Fig. 2** Forest plot of five studies comparing the effects of VR training and active intervention on balance.

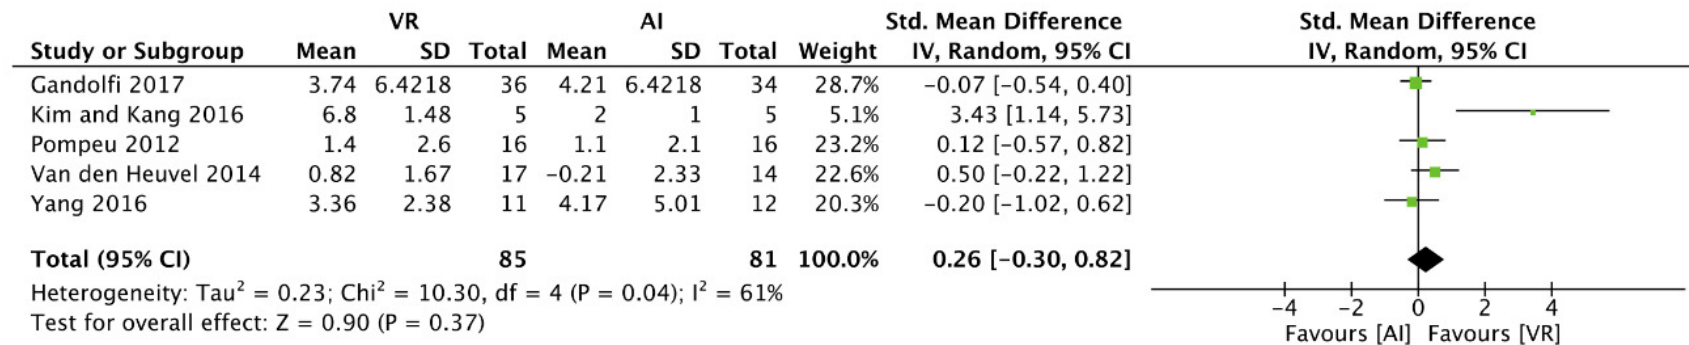

**Supplementary Fig. 3** Forest plot of three studies comparing the effects of VR training and active intervention on motor function.

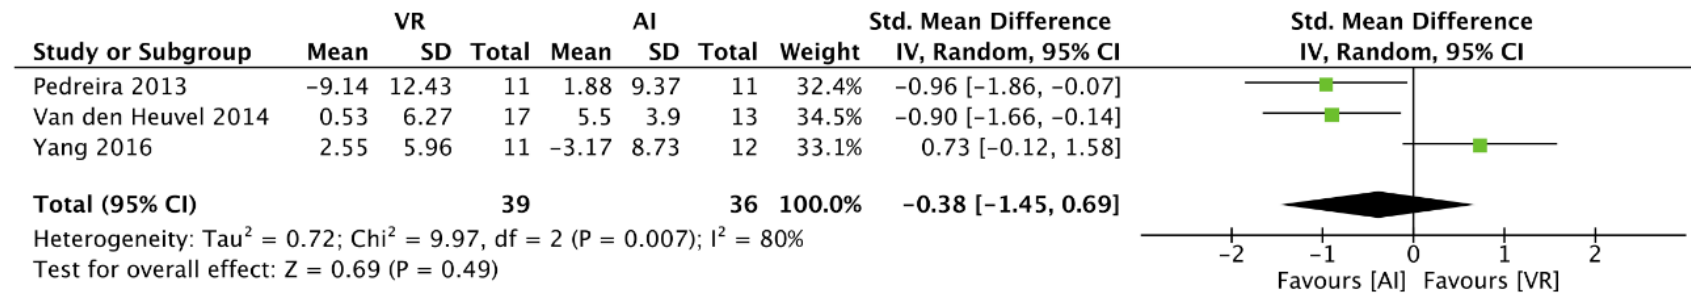

**Supplementary Fig. 4** Forest plot of five studies comparing the effects of VR training and active intervention on quality of life.

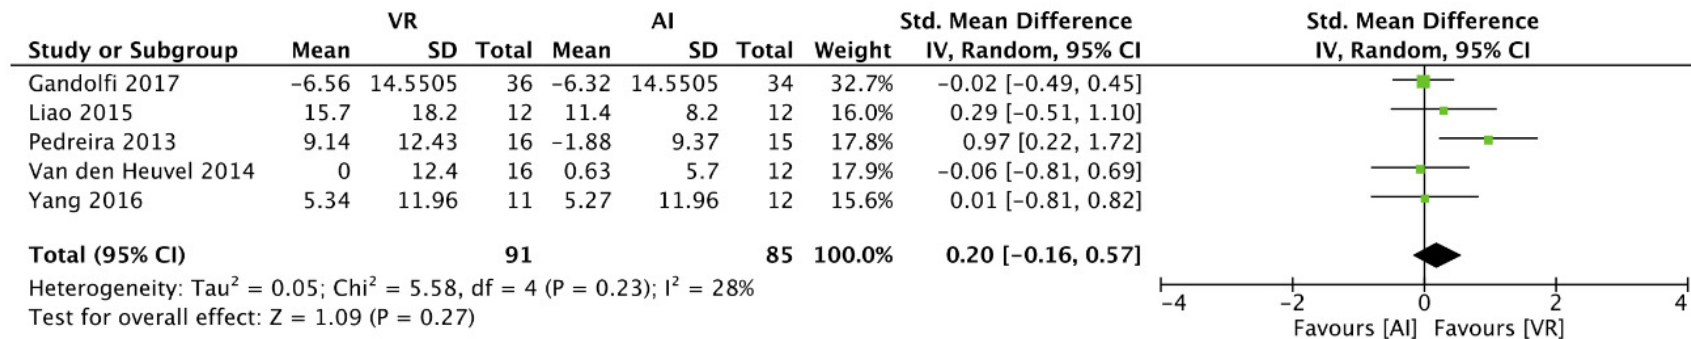

**Supplementary Fig. 5** Forest plot of five studies comparing the effects of VR training and passive intervention on balance.

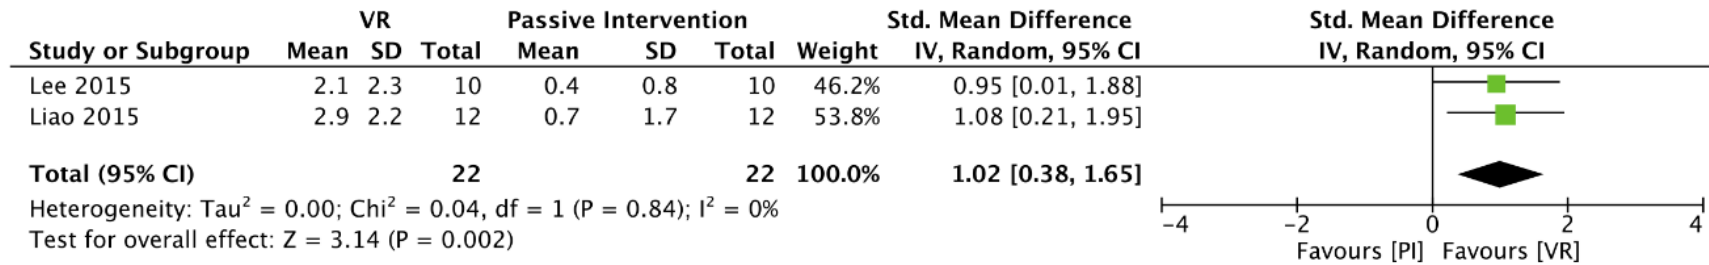

**Supplementary Table 1.** Characteristics of systematic review studies.

| Studies               | n                        | Mean $\pm$ SD<br>age (yrs) | Mean $\pm$ SD<br>PD duration<br>(yrs) | Hoehn<br>Yahr scale | PD<br>drugs | M: F  | Source of VR                                                                                                   | Primary and secondary outcomes                                                                                                          |
|-----------------------|--------------------------|----------------------------|---------------------------------------|---------------------|-------------|-------|----------------------------------------------------------------------------------------------------------------|-----------------------------------------------------------------------------------------------------------------------------------------|
| Arias et al (2012)    | PD (n=10)                | 69.9 $\pm$ 11.2            | N/A                                   | N/A                 | N/A         | 5: 5  | HMD, Vuzix iWear VR920 glasses and motion tracker.                                                             | Detect differences in tapping frequency between groups, check the reliability of using VR.                                              |
|                       | Young control (n=12)     | 24.3 $\pm$ 4.9             |                                       |                     |             | 7: 5  |                                                                                                                |                                                                                                                                         |
|                       | Older control (n=12)     | 66.6 $\pm$ 10.1            |                                       |                     |             | 5: 7  |                                                                                                                |                                                                                                                                         |
| Badarny et al (2014)  | VR (n=20)                | 71.25                      | 5.28                                  | 2.5-4               | Y           | N/A   | Belt-mounted unit, housing motion sensors and digital processing components, and delivered by a micro-display. | Gait speed and stride length.                                                                                                           |
| Cipresso et al (2014) | PD-NC (n=15)             | 69.0 $\pm$ 8.1             | N/A                                   | N/A                 | N/A         | 9: 6  | NeuroVR.                                                                                                       | Investigate the differences in executive function (EF) and VMET scores between groups.                                                  |
|                       | PD-MCI (n=15)            | 68.1 $\pm$ 9.4             |                                       |                     |             | 8: 7  |                                                                                                                |                                                                                                                                         |
|                       | Control (n=15)           | 61.7 $\pm$ 5.2             |                                       |                     |             | 6: 9  |                                                                                                                |                                                                                                                                         |
| de Melo et al (2018)  | VR=12                    | 60.3 $\pm$ 9.3             | N/A                                   | 1.4 $\pm$ 0.5       | Y           | 11: 1 | Xbox Kinect.                                                                                                   | Primary: 6MWT (gait speed and endurance)<br>Secondary: physical fitness (SpO <sub>2</sub> , Heart rate, blood pressure, BORG).          |
|                       | Treadmill=13             | 61.0 $\pm$ 10.7            | N/A                                   | 1.5 $\pm$ 0.7       | Y           | 12: 1 |                                                                                                                |                                                                                                                                         |
|                       | Conventional training=12 | 65.6 $\pm$ 13.0            | N/A                                   | 2.1 $\pm$ 0.9       | Y           | 5: 7  |                                                                                                                |                                                                                                                                         |
| Tremblay et al (2012) | PD=11                    | 61.9 $\pm$ 11.0            | 8.5 $\pm$ 3.6                         | N/A                 | Y           | 6: 5  | Wii Fit.                                                                                                       | Primary: evaluate the effect of VR on balance and functional ability of PD patients.<br>Secondary: compare results with healthy people. |
|                       | Control=9                | 63.5 $\pm$ 12.0            |                                       |                     |             | 5: 4  |                                                                                                                |                                                                                                                                         |
| Galna et al. 2014     | Game design: 2           | N/A                        | N/A                                   | N/A                 | N/A         | N/A   | Xbox Kinect.                                                                                                   | Primary: Assess game design<br>Secondary: assess game feasibility.                                                                      |
|                       | Feasibility: 9           | 68.2 $\pm$ 8.3             | N/A                                   | 1.8 $\pm$ 0.7       | Y           | 3: 6  |                                                                                                                |                                                                                                                                         |
| Gandolfi et al. 2017  | VR=36                    | 67.5 $\pm$ 7.2             | 6.2 $\pm$ 3.8                         | 2.5                 | Y           |       | Tele-Wii protocol, remote physiotherapist, Wii + balance board, laptop with skype.                             | Primary: BBS.<br>Secondary: DGI, 10MWT, MCID, PDQ8, satisfaction of patients and comparison of costs between groups.                    |

|                      |                         |            |          |            |     |       |                                            |                                                                                                                                                                                                  |
|----------------------|-------------------------|------------|----------|------------|-----|-------|--------------------------------------------|--------------------------------------------------------------------------------------------------------------------------------------------------------------------------------------------------|
|                      | SIBT=34                 | 69.8 ±9.4  | 7.5 ±3.9 | 2.5        | Y   |       |                                            |                                                                                                                                                                                                  |
| Herz et al. 2013     | VR=20                   | 66.7 ±7.2  | 5.5 ±4.3 | 2          | Y   | 13: 7 | Nintendo Wii.                              | Primary: change in NEADL<br>Secondary: quality of life and motor function: changes in the UPDRS, the 9-hole peg test, the Purdue Pegboard Test, a timed tapping task, TUG, HAMD, and the PDQ-39. |
| Holmes et al. 2013   | VR=11                   | 66.6 ±5.9  | 8.1±3.8  | 2.3 ±0.4   | Y   | 7: 4  | Nintendo Wii.                              | Balance Centre of Pressure Length (COPL)                                                                                                                                                         |
| Kim et al, 2017      | PD-VR=11                | 65 ±7      | N/A      | N/A        | Y   | 3: 8  | Oculus Rift DK2.                           | Primary: measure adverse effects of using VR.<br>Secondary: measure levels of arousal.                                                                                                           |
|                      | Elderly control=11      | 66 ±3      |          |            |     | 3: 8  |                                            |                                                                                                                                                                                                  |
|                      | Young control=11        | 28 ±7      |          |            |     | 5: 6  |                                            |                                                                                                                                                                                                  |
| Kim & Kang 2016      | VR=5                    | 76.2 ±3.9  | N/A      | 2.2 ±0.4   | N/A | 2: 3  | IREX.                                      | Primary: Balance and gait speed<br>Secondary: falls efficacy.                                                                                                                                    |
|                      | Control=5               | 78.4 ±5.8  | N/A      | 2.4 ±0.5   | N/A | 3: 2  |                                            |                                                                                                                                                                                                  |
| Lee et al. 2015      | VR=10                   | 68.4 ±2.9  | N/A      | N/A        | N/A | 5: 5  | Nintendo Wii.                              | Primary: the effect of VR on balance (BBS).<br>Secondary: the effect of VR on activities of daily living and depression (MBI and BDI).                                                           |
|                      | Control=10              | 70.1 ±3.3  | N/A      | N/A        | N/A | 5: 5  |                                            |                                                                                                                                                                                                  |
| Liao et al, 2015     | VR=12                   | 67.3 ±7.1  | 7.9 ±2.7 | 2.0 ±0.7   | Y   | 6: 6  | Nintendo Wii Fit.                          | Primary: gait speed, stride length, obstacle clearance and dynamic balance.<br>Secondary: Sensory organisation test (SOT), timed up and go test, Falls efficacy and PDQ39.                       |
|                      | Traditional exercise=12 | 65.1 ±6.7  | 6.9 ±2.8 | 2.0 ±0.8   | Y   | 6: 6  |                                            |                                                                                                                                                                                                  |
|                      | Control=12              | 64.6 ±8.6  | 6.4 ±3.0 | 1.9 ±0.8   | Y   | 5: 7  |                                            |                                                                                                                                                                                                  |
| Loureiro et al, 2012 | VR=6                    | 65 ±13     | N/A      | 2-3        | N   | N/A   | Nintendo Wii Fit.                          | Primary: Motor skills (Borg scale, BBS, TUG, functional reach tests) Secondary: quality of life (Nottingham scale).                                                                              |
| Ma et al, 2011       | VR=17                   | 64.8 ±8.5  | 5.3 ±4.4 | 2.06 ±0.24 | Y   | 8: 9  | OpenGL.                                    | Reaching with favoured hand to grab. real stationery and moving balls down a ramp                                                                                                                |
|                      | Control=16              | 68.1 ±7.4  | 5.2 ±3.4 | 2.2 ±0.4   | Y   | 10: 6 |                                            |                                                                                                                                                                                                  |
| Mirelman et al, 2011 | VR=20                   | 67.1 ± 6.5 | 9.8 ±5.6 | 2.2 ±0.4   | Y   | 14: 6 | LED lights on shoes, treadmill and screen. | Primary: gait speed, endurance testing, stride length, obstacle negotiation.<br>Secondary: cognitive and clinical measures (UPDRS and PDQ39)                                                     |

|                             |                    |            |                        |                  |     |        |                                                                                                           |                                                                                                                                                                                                |
|-----------------------------|--------------------|------------|------------------------|------------------|-----|--------|-----------------------------------------------------------------------------------------------------------|------------------------------------------------------------------------------------------------------------------------------------------------------------------------------------------------|
| Messier et al. 2007         | PD=8               | 71.1 ±5.5  | 10.25 ±3.06            | 2.6 ±0.2         | N   | 6: 2   | SGL Octane.                                                                                               | Accuracy in horizontal and vertical dimension                                                                                                                                                  |
|                             | Healthy young=10   | 27         | N/A                    | N/A              | Y   |        |                                                                                                           |                                                                                                                                                                                                |
|                             | Healthy elderly=10 | 68.5       | N/A                    | N/A              | Y   |        |                                                                                                           |                                                                                                                                                                                                |
| Palacios-Navaro et al, 2015 | VR=7               | 66.8 ±3.5  | N/A                    | N/A              | Y   |        | Xbox Kinect.                                                                                              | 10MWT                                                                                                                                                                                          |
| Pedreira et al, 2013        | VR=22              | 61.1 ± 8.2 | 8.6 ±4.6               | 2.5 ±0.6         | N/A | 15: 7  | Nintendo Wii.                                                                                             | Quality of life (PDQ39)                                                                                                                                                                        |
|                             | physiotherapy=22   | 66.2 ±8.5  | 7.3 ±6.6               | 2.5 ±0.6         | N/A | 16: 6  |                                                                                                           |                                                                                                                                                                                                |
| Pompeu et al. 2012          | VR=16              | 60-85      | N/A                    | N/A              | Y   | N/A    | Nintendo Wii.                                                                                             | Primary: independent performance of daily tasks (UPDRS II).<br>Secondary: Dynamic balance (BBS), static balance (unipedal stance test), cognitive performance (Montreal cognitive assessment). |
| Pompeu et al, 2014          | VR=7               | 72 ±9      | N/A                    | 2.1 ±0.6         | Y   | 6: 1   | Xbox Kinect.                                                                                              | Primary: feasibility and safety of using VR (game scores and adverse events).<br>Secondary: clinical outcomes (BESTest, DGI, 6MWT and PDQ39).                                                  |
| Severiano et al. 2018       | VR=16              | 58.7 ±18.7 | 5.1 ±3.2               | N/A              | N/A | N/A    | Nintendo Wii.                                                                                             | Primary: dizziness handicap index (DHI), BBS and SF36 after 20 VR sessions.<br>Secondary: improvement of scores in each game after 20 VR sessions.                                             |
| Shen & Mak 2014             | VR=22              | 63.3 ±8.0  | 8.1 ±4.3               | 2.4 ±0.5         | Y   | 13: 9  | Computerised dancing system + SMART EquiTest balance master.                                              | Primary: balance confidence (ABC).<br>Secondary: balance and gait performance (LOS and SLS).                                                                                                   |
|                             | Physiotherapy=23   | 65.3 ±8.5  | 6.6 ±4.0               | 2.5 ±0.5         | Y   | 12: 11 |                                                                                                           |                                                                                                                                                                                                |
| van den Heuvel et al. 2014  | VR=17              | 66.3 ±6.4  | 9.0 (range: 4.0-13.3)  | 2.5 (range: 2-3) | Y   | 12: 5  | commercially available interactive dynamic balance exercises (Motek Medical, Amsterdam, the Netherlands). | Primary: FRT.<br>Secondary: balance and gait (BBS, SLS, 10MWT). Health status and participation (UPDRS, FES, PDQ39, HADS, MFI).                                                                |
|                             | Physiotherapy=16   | 68.8 ±9.7  | 8.8 ( range: 2.5-11.5) | 2.5 (range: 2-3) | Y   | 8: 8   |                                                                                                           |                                                                                                                                                                                                |
| Yang et al, 2016            | VR=11              | 72.5 ±8.4  | 9.4 ±3.6               | 3 (range: N/A)   | Y   | 4: 7   | VR balance board.                                                                                         | Primary: BBS.<br>Secondary: DGI, TUG, PDQ39, UPDRS.                                                                                                                                            |
|                             | Control=12         | 75.4 ±6.3  | 8.3 ±4.1               | 3 (range: N/A)   | Y   | 5:7    |                                                                                                           |                                                                                                                                                                                                |
| Yen et al. 2011             | VR=14              | 70.4 ±6.5  | 6.0 ±2.9               | 2.6 ±0.5         | Y   | 12:2   | VR balance board.                                                                                         | SOT, auditory arithmetic subtraction task.                                                                                                                                                     |

|                          |                  |           |          |          |     |      |                   |                                                                                                     |
|--------------------------|------------------|-----------|----------|----------|-----|------|-------------------|-----------------------------------------------------------------------------------------------------|
|                          |                  |           |          |          |     |      |                   |                                                                                                     |
|                          | Physiotherapy=14 | 70.1 ±6.9 | 6.1 ±3.3 | 2.4 ±0.5 | Y   | 12:2 |                   |                                                                                                     |
|                          | Control=14       | 71.6 ±5.8 | 7.8 ±4.2 | 2.6 ±0.4 | Y   | 9:5  |                   |                                                                                                     |
| (Zettergren et al. 2011) | VR=1             | 69        | N/A      | N/A      | N/A | 1    | Nintendo Wii Fit. | Primary: measure effect of VR on: gait, TUG, BBS and GDS.<br>Secondary: measure scores of VR games. |

**Abbreviations:** HMD; Head mounted display. VR; virtual reality. PD-NC; Parkinson's disease normal cognition. PD-MCI; Parkinson's disease mild cognitive impairment. VMET; Virtual multiple errands test. 6MWT; 6-minute walk test. SpO<sub>2</sub>; peripheral oxygen saturation. CBM; community balance and mobility assessment. TUG; timed up and go test. ABC; activities balance and confidence scale. STST; sitting to standing test. POMA; performance orientated mobility assessment. SIBT; sensory balance integration training. BBS; Berg balance scale. DGI; Dynamic gait index. 10MWT; 10-meter walk test. MCID; minimal clinically important difference. PDQ8; Parkinson's disease questionnaire 8. NEADL; Nottingham Extended Activities of Daily Living Test. UPDRS; unified Parkinson's disease rating scale. HAMD; Hamilton depression scale. PDQ39; Parkinson's disease questionnaire 39. WBDD-EO; weight bearing distribution difference – with eyes open. ML; Mediolateral. MBI; Modified Barthel index. BDI; Beck Depression Inventory. BESTest; Balance evaluation system test. LOS; limit of stability test. SLS; single leg stance test. FRT; functional reach test. HADS; hospital anxiety and depression. MFI; multidimensional fatigue inventory. GDS; geriatric depression scale. N/A; not available.
